# Supplementary material
Source: PubMed Central journal article supplement (PMC3160028)
Supplement: supp_tpc.111.084103_Graeber-Supplemental-Data.pdf [file supp_tpc.111.084103_Graeber-Supplemental-Data.pdf]

Supplemental Data. Graeber *et al.* (2011). **A Guideline to Family-wide Comparative State-of-the-art qRT-PCR Analysis Exemplified with a Brassicaceae Cross-species Seed Germination Case Study**

Manuscript: PLANTCELL/2011/084103

**Supplemental Figure 1.** Determination of RNA integrity via gel electrophoresis.

**Supplemental Table 1.** Sequence similarities to Arabidopsis and accession numbers of *Lepidium sativum* FR14 reference gene cDNA sequences.

**Supplemental Table 2.** Primer sequences used for quantitative PCR.

**Supplemental Methods**

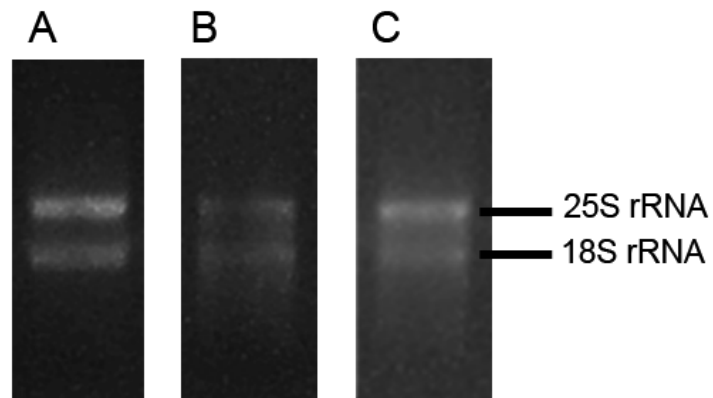

**Supplemental Figure 1.** Determination of RNA integrity via gel electrophoresis.

**(A)** RNA with high integrity used for further analyses: to clear bands for the 25S and 18S rRNA, with the upper band being twice as strong as the lower one. **(B)** and **(C)** RNA with low integrity, which was not further used: showing either not the 2:1 ratio in band intensity between the 25S and the 18S rRNA **(B)** or showing RNA degradation indicated by a smear on the gel **(C)**. Between 100 and 200ng RNA were loaded on a 1% agarose gel.

**Supplemental Table 1.** Sequence similarities to Arabidopsis and accession numbers of *Lepidium sativum* FR14 reference gene cDNA sequences.

| <i>Lepidium sativum</i> reference genes cDNA sequence name | GenBank accession numbers | AGI code of putative Arabidopsis ortholog | e-value | % sequence similarity between the two species |
|------------------------------------------------------------|---------------------------|-------------------------------------------|---------|-----------------------------------------------|
| LesaG17210                                                 | HQ912755                  | At1G17210                                 | 0       | 92                                            |
| LesaG04660                                                 | HQ912754                  | At2G04660                                 | 0       | 92                                            |
| LesaG19980                                                 | HQ912756                  | At2G19980                                 | 1e-71   | 77                                            |
| LesaG20000                                                 | HQ912757                  | At2G20000                                 | 4e-160  | 92                                            |
| LesaG04320                                                 | HQ912753                  | At4G04320                                 | 8e-90   | 91                                            |
| LesaCYP1                                                   | HS981851                  | At4G38740                                 | 7e-42   | 94                                            |
| LesaACT7                                                   | HS981849                  | At5G09810                                 | 8e-32   | 100                                           |
| LesaACT8                                                   | HS981850                  | At1G49240                                 | 8e-33   | 96                                            |
| LesaEF1- $\alpha$                                          | HS981853                  | At5G60390                                 | 6e-20   | 94                                            |
| LesaCYP5                                                   | HS981852                  | At2G29960                                 | 9e-33   | 93                                            |
| LesaUBQ11                                                  | HS981854                  | At4G05050                                 | 2e-34   | 92                                            |

**Supplemental Table 2.** Primer sequences used for quantitative PCR.

| Primer name   | Sequence (5' to 3')       |
|---------------|---------------------------|
| At1g17210-qF2 | CTGCTTCATATGAATCACGAG     |
| At1g17210-qR2 | TCAACACTATCTGCACGTTGT     |
| At2g04660-qF1 | TTCTGGAAGCAGTGGGTGAA      |
| At2g04660-qR1 | CTCCACTTCCATCTGTAAGC      |
| At2g19980-F1  | AATATTCCACCGACGGAACG      |
| At2g19980-R1  | TAAGGCTTCTCCGTAAACCAA     |
| At2g20000-qF1 | GTATAGCTCCACCACCACTT      |
| At2g20000-qR1 | TCTTCTAGGTGCTTGAAGAGT     |
| AT4g04320-qF1 | ACTCGGTATGTGGCTTAGTC      |
| AT4g04320-qR1 | TTCTCAAGCAATGAAGCAGGA     |
| Lesa17210-FP2 | TCCGCCCTTGTATGGACGAGAAG   |
| Lesa17210-RP2 | CTCTGGCACCTGGGAAAGCCA     |
| Lesa04660-FP1 | AGCTGGGTCTATTGCACGAAGGG   |
| Lesa04660-RP1 | TCGTTTGCTCACTGCTGGTGCTT   |
| Lesa19980-FP1 | TGTAGCACAACCAAGCCTAGTCGAT |
| Lesa19980-RP1 | GGGTCCAACCTCAGGACACAATGA  |
| Lesa20000-FP1 | TCTGGTCCACGACGGAGCTTG     |
| Lesa20000-RP1 | GCGTTGCTCACATTTCCGCTTACT  |
| Lesa04320-FP2 | AAGCAATGAAGCAGGATCATCCCAA |
| Lesa04320-RP2 | AGGAGAACTCGGTATGTGGCTTAGT |
| Ubi11-qPCR-F2 | GATGCAGATCTTCGTAAAGACT    |
| Ubi11-qPCR-R2 | CCTTCCTTATCCTGGATCTTG     |
| Ef1a-qPCR-F   | TGAGCACGCTCTTCTTGCT       |
| Ef1a-qPCR-R   | GTGGCATCCATCTTGTTACA      |
| Cyp1-qPCR-F2  | GGATCCTGTTCGATGGCGAAC     |
| Cyp1-qPCR-R2  | TCCACGACCTGCCCAAACAC      |
| Cyp5-qPCR-F2  | CTTCAGAGCTTTGTGCACAGG     |
| Cyp5-qPCR-R2  | AAGCTGGGAATGATTTCGATG     |
| Act7/8-qPCR-F | GGTCGTACAACCGGTATTGT      |
| Act7-qPCR-R   | GATAGCATGTGGAAGTGAGAA     |
| Act8-qPCR-R   | GAAGAGCATAACCCTCGTA       |
| 5.8S rRNA-For | CTTTGAAGCCAAGTTGCGC       |
| 5.8S rRNA-Rev | CGTCCCACACTCGTGAAAT       |

## Supplemental Methods

Selection procedure to identify gene-probes on a *Brassica* microarray (Xiang et al. 2008, GEO platform GPL8090) which most likely bind the putative *Brassica napus* orthologs of Arabidopsis reference genes used in our seed germination qRT-PCR analysis (Figure 4).

Genedata Expressionist Analyst 2.1 software was used to analyse the *B. napus* endosperm development dataset (GEO accession GSE14766) produced with the above mentioned microarray. First the microarray annotation file was searched for probe annotations matching Arabidopsis reference gene AGI numbers. If an annotation matched unambiguously only one probe on the array this probe was taken to represent the putative *B. napus* ortholog of the annotated Arabidopsis gene. Annotations were found for every tested reference gene except At2G04660 and At4G04320. Since not all probes on the array are annotated we checked if these genes are indeed not represented. Therefore we used BLAST (blastn, Evaluate cutoff E-5) with the Arabidopsis coding sequences of these two genes against a *Brassica* EST library including all sequences present on the microarray amongst others (dataset available under [www.brassicagenomics.ca/ests/](http://www.brassicagenomics.ca/ests/)). Matching ESTs were found meaning that putative orthologs of these two Arabidopsis genes are generally present in *Brassica* spp. but none of the identified ESTs had a corresponding probe on the microarray. Therefore these two genes are not included in further analysis.

Multiple probes on the *Brassica* microarray contained the same AGI annotation. Therefore we analysed which of these *Brassica* probes corresponds most likely to the annotated Arabidopsis gene. First all probes containing the same AGI annotation were checked if they bind genes that are commonly expressed in the *B. napus* endosperm development dataset (to avoid making decision between probes of which some might not yield a signal) by verifying their presence in the 'commonly expressed gene subset' (see Supplemental Table 8 in Huang et al. (2009). Only probes which were present in this subset, which means that they show at least expression signal values of 5000, were taken for further analysis. If only one probe per AGI annotation was left, this was taken to represent the putative *B. napus* ortholog of the annotated Arabidopsis gene. If still multiple probes were present containing the same AGI annotation, similarity of the probes to the annotated Arabidopsis gene was analysed by pairwise alignment (using bioinformatics software suite Geneious Pro 5.0.4). Each probe was independently aligned against the Arabidopsis gene coding sequence using a global alignment algorithm (ClustalW 2.0.12, cost matrix IUB; penalties: Gap open 15, extension 6.66, free end gaps). The probe scoring the highest pairwise identity (which is the percentage of pairwise residues that are identical in the alignment which is computed by looking at a pair of bases at the same column (including gap versus non-gap residues), scoring a hit when they are identical, divided by the total number of pairs) in alignments of comparable length was considered to be the probe which most likely will bind the putative *B. napus* ortholog of a specific Arabidopsis gene.
